# Supplementary material
Source: MDPI journal article supplement (https://www.mdpi.com/2071-1050/11/1/16)
Supplement: s1 [file s1]

Table S1: Summary of Measurement Scales

| Construct | Measurement Item                                                  | Alpha |
|-----------|-------------------------------------------------------------------|-------|
| ATT       |                                                                   | 0.93  |
| ATT1      | For me learning English is useful                                 |       |
| ATT2      | For me learning English is pleasant                               |       |
| ATT3      | For me learning English is wise                                   |       |
| ATT4      | For me learning English is good                                   |       |
| SN        |                                                                   | 0.90  |
| SN1       | People who are important to me think that I should learn English  |       |
| SN2       | Most people who are important to me will learn English            |       |
| SN3       | People who are important to me think English is important         |       |
| SN4       | People whose opinions I value will expect me to learn English     |       |
| PBC       |                                                                   | 0.87  |
| PBC1      | If I want, I can speak English well                               |       |
| PBC2      | For me studying English is easy                                   |       |
| PBC3      | It is mostly up to me whether I can learn English                 |       |
| MI        |                                                                   | 0.915 |
| MI1       | I make lots of efforts to improve my English                      |       |
| MI2       | I make lots of efforts to understand difficult English sentences  |       |
| MI3       | I make lots efforts to understand difficult English grammar       |       |
| DLE       |                                                                   | 0.835 |
| DLE1      | I would like to learn English as much as possible                 |       |
| DLE2      | I wish I had started to learn English more earlier                |       |
| DLE3      | I want to be fluent in English                                    |       |
| SC        |                                                                   |       |
| PEC       | I think I am good at reading English                              | 0.87  |
|           | I think I am good at listening to English                         |       |
|           | I think I am good at speaking English                             |       |
|           | I think I am good at writing English                              |       |
| LEA       | I don't feel anxious when I speak English                         | 0.91  |
|           | I do not worry about my English ability                           |       |
|           | I feel uncomfortable if somebody asks me in English               |       |
|           | I don't feel anxious when I make presentation in English          |       |
|           | I feel comfortable when I have to talk with foreigners in English |       |
| BI        |                                                                   | 0.86  |
| BI1       | I will continue to study English                                  |       |
| BI2       | I will do my best to improve my English                           |       |
| BI3       | I will learn English as much as I can                             |       |

Note.  $N = 614$ ; ATT = Attitude; SN = Subjective Norm; PBC = Perceived Behavioral Control; MI= Motivational Intensity; DLE= Desire to Learn English; SC = Linguistic Self-Competence; PEC= Perceptions of English Competence; LEA= Lack of English Anxiety; BI = Behavioral Control
